# Supplementary material for: Toll signals regulate dorsal–ventral patterning and anterior–posterior placement of the embryo in the hemipteran Rhodnius prolixus
Source: PubMed Central journal article supplement (PMC4407881; doi:10.1186/2041-9139-5-38), 2014-10-27
Supplement: 13227_2014_133_MOESM4_ESM.pdf [file 13227_2014_133_MOESM4_ESM.pdf]

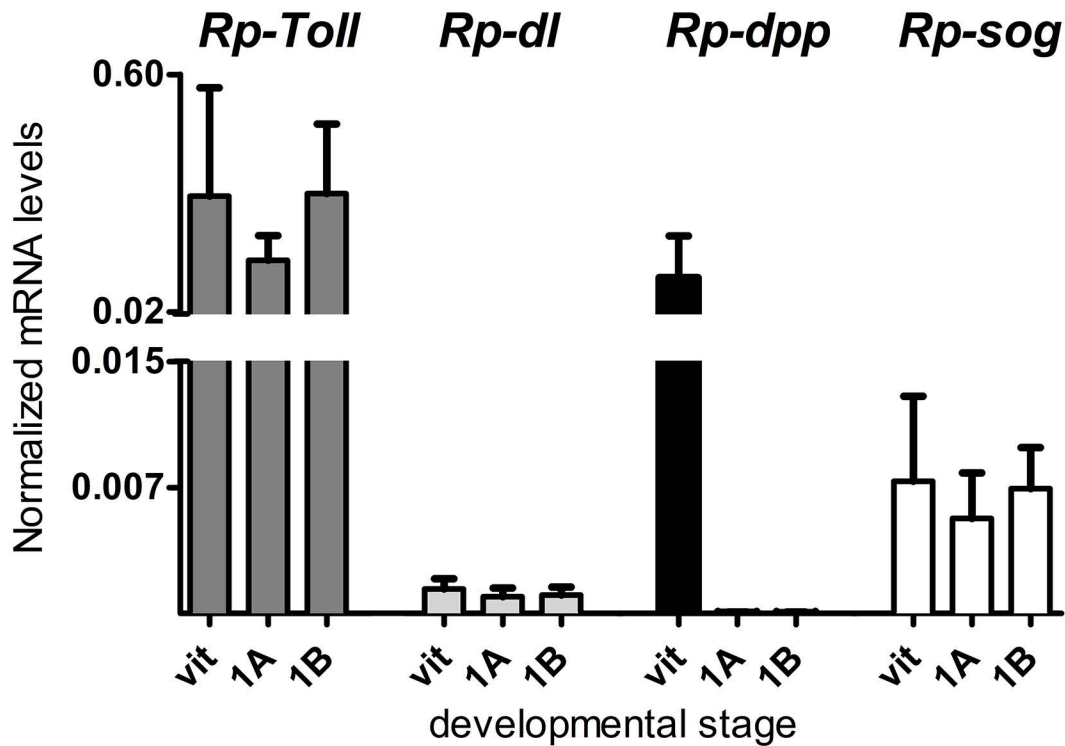

**Additional Figure 4. Normalized mRNA levels for *Rp-Toll*, *Rp-dl*, *Rp-dpp* and *Rp-sog* during vitellogenesis (vit) and early embryonic stages (1A and 1B).** Absolute mRNA levels for each gene were normalized to *Ef1* and plotted in logarithmic scale to show differences in levels between the different genes. This analysis show that *Rp-dpp* is expressed during oogenesis but the mRNA is not transferred to the embryo. No *Rp-dpp* expression is seen at the early stages that could result in effects along the embryonic DV axis.
